# Supplementary material
Source: MDPI journal article supplement (https://www.mdpi.com/2076-3417/7/9/936)
Supplement: s1 [file s1]

Google Maps - pygmaps 
